# Supplementary material for: Structural determinants of CO2-sensitivity in the β connexin family suggested by evolutionary analysis
Source: PubMed Central journal article supplement (PMC6726660; doi:10.1038/s42003-019-0576-2), 2019-09-04
Supplement: 42003_2019_576_MOESM1_ESM.pdf [file 42003_2019_576_MOESM1_ESM.pdf]

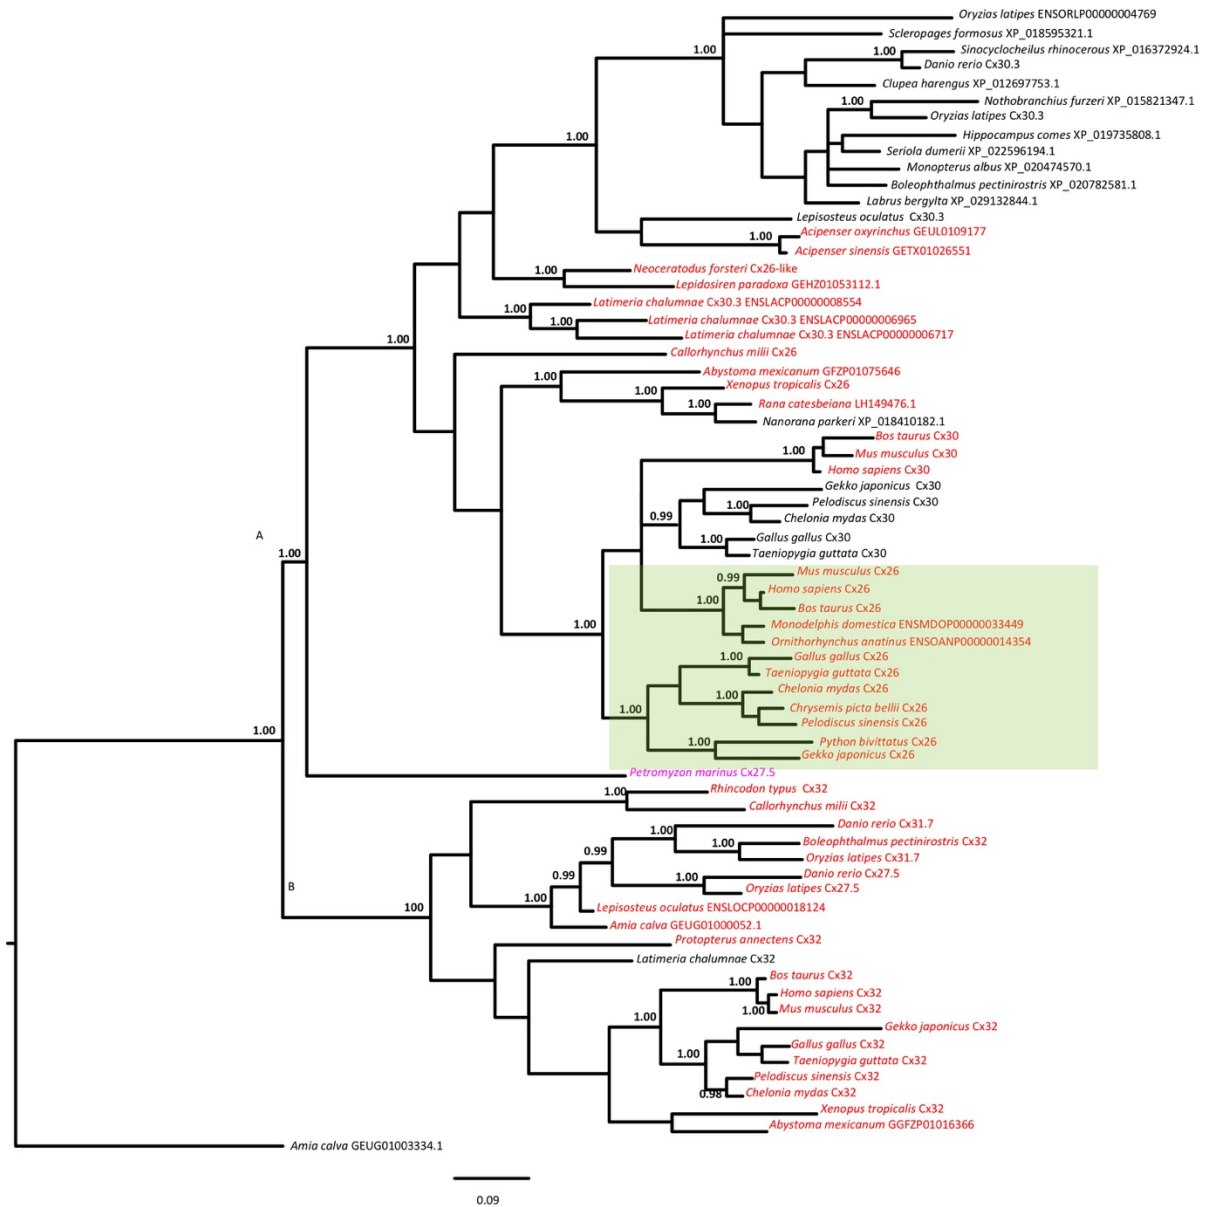

### Supplementary Figure 1 Molecular phylogenetic tree of Cx26, Cx30 and Cx32 genes.

This analysis includes all of the sequences in Supplementary Tables 1 and 2. Bayesian Inference on amino acid sequences belonging to the main vertebrate lineages. Numbers close to nodes indicate posterior probability values (>0.95). *Amia calva* GEUG01003334.1 (Cx31-like) was used as the outgroup. If the species name is red, the sequence possesses the carbamylation motif. The green box indicates Cx26 with a short C-terminal tail. Two main clades are apparent and labelled A and B.

### Methods

The alignment was performed with MUSCLE (<https://www.ebi.ac.uk/Tools/msa/muscle/>) using default parameters. The phylogenetic analysis was carried out with MrBayes-3.2.1. On the basis of the results of microsyntenic analysis the sequence of *Petromyzon marinus* (Cx27.5) was constrained to form a monophyletic clade with those located in the same genomic region. The Jones aa model 2 was identified by the MrBayes program with a posterior probability of 1.00. The connexin sequence of *Amia calva* was used as the outgroup (accession number GEUG01003334.1); 5,000,000 generations were run and sampling was conducted every 100 generations. Stationarity was defined as the condition

where the standard deviation of split frequencies reached 0.0057. The first 12,500 trees were discarded as the burn-in.

1. Huelsenbeck, J. P., Ronquist, F., Nielsen, R. & Bollback, J. P. Bayesian inference of phylogeny and its impact on evolutionary biology. *Science* 294, 2310-2314, doi:10.1126/science.1065889 (2001).

2. Jones, D. T., Taylor, W. R. & Thornton, J. M. The rapid generation of mutation data matrices from protein sequences. *Comput Appl Biosci* 8, 275-282 (1992).

## Supplementary Tables

| Class      | Order         | Species                    | Gene | Accession number   |
|------------|---------------|----------------------------|------|--------------------|
| Mammalia   | Primates      | <i>Homo sapiens</i>        | Cx32 | ENSP00000363134    |
|            |               |                            | Cx26 | ENSP00000495035    |
|            |               |                            | Cx30 | ENSP00000348521    |
|            | Rodentia      | <i>Mus musculus</i>        | Cx32 | ENSMUSP00000113516 |
|            |               |                            | Cx26 | ENSMUSP00000054343 |
|            |               |                            | Cx30 | ENSMUSP00000035630 |
|            | Artiodactyla  | <i>Bos taurus</i>          | Cx32 | ENSBTAP00000027331 |
|            |               |                            | Cx26 | ENSBTAP00000023167 |
|            |               |                            | Cx30 | ENSBTAP00000052852 |
| Aves       | Galliformes   | <i>Gallus gallus</i>       | Cx32 | ENSGALP00000050756 |
|            |               |                            | Cx26 | ENSGALP00000035659 |
|            |               |                            | Cx30 | ENSGALP00000027628 |
|            | Passeriformes | <i>Taeniopygia guttata</i> | Cx32 | ENSTGUP00000007332 |
|            |               |                            | Cx26 | ENSTGUP00000011656 |
|            |               |                            | Cx30 | ENSTGUP00000011657 |
| Sauropsida | Testudines    | <i>Pelodiscus sinensis</i> | Cx32 | ENSPSIP00000000180 |
|            |               |                            | Cx26 | ENSPSIP00000001776 |
|            |               |                            | Cx30 | ENSPSIP00000001778 |
|            |               | <i>Chelonia mydas</i>      | Cx32 | XP_007056181.1     |
|            |               |                            | Cx26 | XP_007059201.1     |
|            |               |                            | Cx30 | XP_007059188.1     |
|            | Squamata      | <i>Gekko japonicus</i>     | Cx32 | XP_015264464.1     |
|            |               |                            | Cx26 | XP_015284986.1     |
|            |               |                            | Cx30 | XP_015284969.1     |
| Amphibia   | Anura         | <i>Xenopus tropicalis</i>  | Cx32 | ENSXETP00000055497 |
|            |               |                            | Cx26 | ENSXETP00000055228 |

|                    |                    |                                      |        |                    |
|--------------------|--------------------|--------------------------------------|--------|--------------------|
|                    |                    | <i>Abystoma mexicanum</i>            | Cx32   | GGFZP01016366.1    |
|                    |                    |                                      | Cx26   | GFZP01075646.1     |
| Sarcopterygii      | Coelacanthiformes  | <i>Latimeria chalumnae</i>           | Cx32   | ENSLACP00000004817 |
|                    |                    |                                      | Cx30.3 | ENSLACP00000006965 |
|                    |                    |                                      | Cx30.3 | ENSLACP00000006717 |
|                    |                    |                                      | Cx30.3 | ENSLACP00000008554 |
|                    |                    | <i>Protopterus annectens</i>         | Cx32   | MN231038           |
|                    |                    | <i>Neoceratodus forsteri</i>         | Cx26   | MN231039           |
|                    |                    | <i>Lepidosiren paradoxa</i>          | Cx26   | GEHZ01053112.1     |
| Actinopterygii     | Lepisosteiformes   | <i>Lepisosteus oculatus</i>          | Cx30.3 | ENSLOCP00000021909 |
|                    |                    |                                      |        | ENSLOCP00000018124 |
|                    | Acipenseriformes   | <i>Acipenser oxyrinchus</i>          | Cx30.3 | GEUL01091774.1     |
|                    |                    | <i>Acipenser sinensis</i>            | Cx32   | GETX01026551.1     |
|                    | Cypriniformes      | <i>Danio rerio</i>                   | Cx30.3 | ENSARP00000062668  |
|                    |                    |                                      | Cx27.5 | ENSARP00000051538  |
|                    |                    |                                      | Cx31.7 | ENSARP00000124413  |
|                    | Beloniformes       | <i>Oryzias latipes</i>               | Cx30.3 | ENSORLP00000016225 |
|                    |                    |                                      | Cx30.3 | ENSORLP00000004769 |
|                    |                    |                                      | Cx27.5 | ENSORLP00000011896 |
|                    |                    |                                      | Cx31.7 | ENSORLP00000008192 |
|                    | Amiiformes         | <i>Amia calva</i>                    | Cx32   | GEUG01000052.1     |
|                    | Perciformes        | <i>Boleophthalmus pectinirostris</i> | Cx26   | XP_020782581.1     |
|                    |                    |                                      | Cx32   | XP_020784229.1     |
| Chondrichthyes     | Chimaeriformes     | <i>Callorhynchus milii</i>           | Cx32   | SINCAMP00000026088 |
|                    |                    |                                      | Cx26   | SINCAMP00000001808 |
|                    | Orectolobiformes   | <i>Rhincodon typus</i>               | Cx32   | XP_020379030.1     |
| Petromyzontiformes | Petromyzontiformes | <i>Petromyzon marinus</i>            | Cx27.5 | ENSPMAP00000009847 |

**Supplementary Table 1. Accession numbers of sequences used in the phylogenetic analysis of Figures 1 and 2.**

| Species                            | Accession          | Carbamylation motif | C-terminal tail |
|------------------------------------|--------------------|---------------------|-----------------|
| <i>Sinocyclocheilus rhinoceros</i> | XP_016372924.1     | No                  | Long            |
| <i>Clupea harengus</i>             | XP_012697753.1     | No                  | Long            |
| <i>Monopterus albus</i>            | XP_020474570.1     | No                  | Long            |
| <i>Labrus bergylta</i>             | XP_020487680.1     | No                  | Long            |
| <i>Hippocampus comes</i>           | XP_019735808.1     | No                  | Long            |
| <i>Scleropages formosus</i>        | XP_018595321.1     | No                  | Long            |
| <i>Seriola dumerili</i>            | XP_022596194.1     | No                  | Long            |
| <i>Nothobranchius furzeri</i>      | XP_015821347.1     | No                  | Long            |
| <i>Rana catesbeiana</i>            | LH149476.1         | Yes                 | Long            |
| <i>Nanorana parkeri</i>            | XP_018410182.1     | No                  | Long            |
| <i>Chrysemis picta bellii</i>      | XP_005312279.1     | Yes                 | Short           |
| <i>Python bivittatus</i>           | XP_007427604.1     | Yes                 | Short           |
| <i>Monodelphis domestica</i>       | ENSMODP00000033449 | Yes                 | Short           |
| <i>Ornithorhynchus anatinus</i>    | ENSOANP00000014354 | Yes                 | Short           |

**Supplementary Table 2. Analysis of Cx26 from additional species, not shown in Figure 1 of main paper, to indicate presence of carbamylation motif and length of C-terminal tail. Amniotes are shaded in green.**
